# Supplementary material
Source: PubMed Central journal article supplement (PMC3626729)
Supplement: NIHMS423015-supplement-supplement_1.pdf [file NIHMS423015-supplement-supplement_1.pdf]

JID-R

11/20/2012

**Supplemental file:****Table 1. Clinical characteristic of patients with SSc**

| Subject | Age | Sex | Disease<br>duration*<br>(years) | SSc subset |
|---------|-----|-----|---------------------------------|------------|
| sd12-5  | 64  | M   | 27                              | dcSSc      |
| sd12-14 | 55  | M   | 30                              | dcSSc      |
| sd12-28 | 65  | F   | 6                               | dcSSc      |
| sd12-27 | 59  | M   | 20                              | dcSSc      |
| sd12-9  | 42  | M   | 17                              | dcSSc      |
| sd12-11 | 58  | F   | 21                              | dcSSc      |
| sd12-24 | 42  | M   | 1                               | dcSSc      |
| sd11-44 | 62  | M   | 21                              | dcSSc      |
| sd11-43 | 65  | M   | 9                               | lSSc       |
| sd12-29 | 58  | M   | 22                              | lSSc       |

\* From first non-Raynaud syndrome.

dcSSc, diffuse cutaneous SSc; lSSc, limited cutaneous SSc.
